# Supplementary material for: Linking vestibular function and sub-cortical grey matter volume changes in a longitudinal study of aging adults
Source: bioRxiv or medRxiv preprint supplement (doi:10.1101/2020.11.17.20233684), 2021-07-07
Supplement: Supplementary file [file media-1.pdf]

### Supplemental Information

**Table S1.** Vestibular and hearing predictors of regional volume (cm<sup>3</sup>) under the alternate hypothesis additionally controlling for the four-frequency pure tone average (PTA) (n=84) with mean ± standard error (uncorrected p-value). The speech-frequency PTA of air-conduction thresholds at 0.5, 1, 2, and 4 kHz from the better ear was used. Key: PTA: Pure Tone Average, \*: p < 0.05, \*\*: p < 0.01.

| Vestibular Variable                   | Outcome           | Effect of Vestibular Variable on Outcome | Effect of PTA on Outcome         |
|---------------------------------------|-------------------|------------------------------------------|----------------------------------|
| <b>Best corrected cVEMP amplitude</b> |                   |                                          |                                  |
|                                       | Hippocampus       | -0.0185 ± 0.0181<br>(p=0.311)            | -0.00844 ± 0.00428<br>(p=0.0517) |
|                                       | Left              | -0.00210 ± 0.00916<br>(p=0.82)           | -0.00372 ± 0.00214<br>(p=0.0856) |
|                                       | Right             | -0.0162 ± 0.0112<br>(p=0.154)            | -0.00456 ± 0.00253<br>(p=0.0740) |
|                                       | Thalamus          | 0.0380 ± 0.0244<br>(p=0.125)             | 0.00371 ± 0.00600<br>(p=0.538)   |
|                                       | Left              | 0.0191 ± 0.0127<br>(p=0.138)             | 0.000769 ± 0.00312<br>(p=0.806)  |
|                                       | Right             | 0.0192 ± 0.0134<br>(p=0.159)             | 0.00253 ± 0.00320<br>(p=0.431)   |
|                                       | Basal Ganglia     | 0.0653 ± 0.0335<br>(p=0.0596)            | 0.0108 ± 0.00889<br>(p=0.230)    |
|                                       | Left              | 0.0292 ± 0.0173<br>(p=0.106)             | 0.00563 ± 0.00456<br>(p=0.224)   |
|                                       | Right             | 0.0332 ± 0.0185<br>(p=0.0798)            | 0.00503 ± 0.00479<br>(p=0.297)   |
|                                       | Entorhinal Cortex | -0.0306 ± 0.0322<br>(p=0.344)            | 0.00739 ± 0.00503<br>(p=0.144)   |
|                                       | Left              | -0.0243 ± 0.0179<br>(p=0.179)            | 0.00404 ± 0.00300<br>(p=0.181)   |
|                                       | Right             | -0.00577 ± 0.0191<br>(p=0.763)           | 0.00389 ± 0.00265<br>(p=0.145)   |
| <b>Best oVEMP Amplitude (µV)</b>      |                   |                                          |                                  |
|                                       | Hippocampus       | -0.00146 ± 0.00216<br>(p=0.501)          | -0.0057 ± 0.00393<br>(p=0.149)   |
|                                       | Left              | -0.000629 ± 0.00118<br>(p=0.597)         | -0.00392 ± 0.00205<br>(p=0.058)  |
|                                       | Right             | -0.000887 ± 0.00125<br>(p=0.479)         | -0.00159 ± 0.00224<br>(p=0.479)  |
|                                       | Thalamus          | -0.0026 ± 0.00295<br>(p=0.383)           | 0.00878 ± 0.00551<br>(p=0.115)   |
|                                       | Left              | -0.000943 ± 0.00159<br>(p=0.555)         | 0.00374 ± 0.00293<br>(p=0.206)   |
|                                       | Right             | -0.00148 ± 0.00161<br>(p=0.363)          | 0.00478 ± 0.00294<br>(p=0.108)   |

|                      |                   |                                  |                                   |
|----------------------|-------------------|----------------------------------|-----------------------------------|
|                      | Basal Ganglia     | -0.00213 ± 0.00444<br>(p=0.634)  | 0.0154 ± 0.00891<br>(p=0.0879)    |
|                      | Left              | -0.0015 ± 0.00198<br>(p=0.453)   | 0.00708 ± 0.0041<br>(p=0.0889)    |
|                      | Right             | -9.39e-05 ± 0.00267<br>(p=0.972) | 0.00767 ± 0.00511<br>(p=0.137)    |
|                      | Entorhinal Cortex | 0.000749 ± 0.00345<br>(p=0.829)  | 0.00893 ± 0.00455<br>(p=0.0519)   |
|                      | Left              | 0.00176 ± 0.00187<br>(p=0.351)   | 0.00498 ± 0.00273<br>(p=0.0709)   |
|                      | Right             | -0.000533 ± 0.00195<br>(p=0.785) | 0.00481 ± 0.00227<br>(p=0.0359 *) |
| <b>Mean VOR Gain</b> |                   |                                  |                                   |
|                      | Hippocampus       | 0.217 ± 0.096<br>(p=0.0273 *)    | -0.00574 ± 0.00359<br>(p=0.113)   |
|                      | Left              | 0.138 ± 0.0494<br>(p=0.00697 **) | -0.00308 ± 0.00181<br>(p=0.0914)  |
|                      | Right             | 0.076 ± 0.0554<br>(p=0.175)      | -0.00257 ± 0.00205<br>(p=0.213)   |
|                      | Thalamus          | 0.181 ± 0.123<br>(p=0.146)       | 0.00431 ± 0.00483<br>(p=0.375)    |
|                      | Left              | 0.121 ± 0.068<br>(p=0.0797)      | 0.00316 ± 0.00263<br>(p=0.233)    |
|                      | Right             | 0.057 ± 0.0676<br>(p=0.402)      | 0.00114 ± 0.00259<br>(p=0.662)    |
|                      | Basal Ganglia     | 0.189 ± 0.19 (p=0.325)           | 0.0117 ± 0.00753<br>(p=0.122)     |
|                      | Left              | 0.129 ± 0.0945<br>(p=0.178)      | 0.00737 ± 0.00379<br>(p=0.0552)   |
|                      | Right             | 0.0564 ± 0.113<br>(p=0.619)      | 0.00455 ± 0.00421<br>(p=0.283)    |
|                      | Entorhinal Cortex | -0.0259 ± 0.177<br>(p=0.884)     | 0.00691 ± 0.00431<br>(p=0.111)    |
|                      | Left              | 0.0316 ± 0.0994<br>(p=0.752)     | 0.00289 ± 0.00264<br>(p=0.276)    |
|                      | Right             | -0.053 ± 0.094<br>(p=0.574)      | 0.00423 ± 0.00209<br>(p=0.0459 *) |
